# Supplementary material
Source: publisher site journal article supplement (https://www.dovepress.com/article/180655)
Supplement: Supplementary file 1 [file get_supplementary_file.php]

## Supplementary Information

**Table S1 Bivariate Huber Correlation Coefficients for  $\Delta T_2$  Values  
(Fresh minus Frozen Plasma or Serum Water  $T_2$ )**

| <u>Biomarker<sup>a</sup></u>                   | <u>n</u> | <u><math>\Delta T_2</math> Plasma</u> | <u>n</u> | <u><math>\Delta T_2</math> Serum</u> |
|------------------------------------------------|----------|---------------------------------------|----------|--------------------------------------|
| <b>MetS Markers</b>                            |          |                                       |          |                                      |
| Fresh serum $T_2$                              |          | n.s. <sup>b</sup>                     | 44       | +0.32* <sup>c</sup>                  |
| Fresh plasma-Fresh serum $T_2$                 | 43       | +0.50***                              | 43       | +0.33*                               |
| <b>Insulin &amp; Glucose Markers</b>           |          |                                       |          |                                      |
| Insulin/Insulin C-peptide ratio                | 43       | +0.37*                                |          | n.s.                                 |
| Proinsulin/insulin ratio                       | 42       | -0.30*                                |          | n.s.                                 |
| <b>Lipid &amp; Lipoprotein Markers</b>         |          |                                       |          |                                      |
| TG                                             | 43       | -0.35*                                | 44       | -0.38*                               |
| TG/HDL                                         | 43       | -0.43**                               | 44       | -0.39**                              |
| TG/TC                                          | 43       | -0.30*                                | 44       | -0.39**                              |
| VLDL-C                                         | 36       | -0.30*                                | 37       | -0.41*                               |
| LDL/HDL ratio                                  | 43       | -0.44**                               |          | n.s.                                 |
| HDL-C                                          |          | n.s.                                  | 44       | +0.32*                               |
| Apo AI                                         |          | n.s.                                  | 37       | +0.35*                               |
| <b>Inflammation &amp; Blood Cell Markers</b>   |          |                                       |          |                                      |
| Eosinophil count                               | 43       | -0.44**                               |          | n.s.                                 |
| IgM                                            | 43       | +0.42**                               |          | n.s.                                 |
| <b>Electrolyte Markers</b>                     |          |                                       |          |                                      |
| Cl <sup>-</sup>                                | 42       | -0.34*                                | 43       | -0.30*                               |
| <b>Liver Function &amp; Amino Acid Markers</b> |          |                                       |          |                                      |
| GGT                                            | 43       | -0.42**                               |          | n.s.                                 |
| Sarcosine                                      |          | n.s.                                  | 30       | -0.49***                             |
| Proline                                        |          | n.s.                                  | 30       | -0.40*                               |
| <b>Kidney Function Markers</b>                 |          |                                       |          |                                      |
| eGFR                                           | 43       | +0.40**                               |          | n.s.                                 |

<sup>a</sup> Correlations were checked against all of the biomarkers listed in Table S3. Only those that had one or more statistically significant Huber correlation coefficients are shown here.

<sup>b</sup> n.s., non-significant ( $p \geq 0.05$ )

<sup>c</sup> \* $p < 0.05$ , \*\* $p < 0.01$ , \*\*\* $p < 0.001$ , \*\*\*\* $p < 0.0001$

**Table S2 Bivariate Correlations (Pearson, Spearman and Huber) between Frozen Plasma Water T<sub>2</sub> and Metabolic Biomarkers**

| <b>Bivariate Correlations Frozen Plasma T<sub>2</sub></b> |          |                    |                     |                        |
|-----------------------------------------------------------|----------|--------------------|---------------------|------------------------|
| <u>Biomarker</u>                                          | <u>n</u> | <u>r (Pearson)</u> | <u>ρ (Spearman)</u> | <u>M-value (Huber)</u> |
| Fresh Plasma T <sub>2</sub>                               | 43       | 0.94*****          | 0.93*****           | 0.94*****              |
| Fresh Serum T <sub>2</sub>                                | 44       | 0.82*****          | 0.79*****           | 0.86*****              |
| <b>Insulin &amp; Glucose Markers</b>                      |          |                    |                     |                        |
| McAuley Index                                             | 44       | 0.69*****          | 0.69*****           | 0.75*****              |
| QUICKI                                                    | 44       | 0.68*****          | 0.66*****           | 0.70*****              |
| FIRI †                                                    | 44       | -0.68*****         | -0.63*****          | 0.68*****              |
| HOMA-IR (insulin c-pep) †                                 | 44       | -0.67*****         | -0.64*****          | -0.73*****             |
| HOMA2-IR (insulin) †                                      | 40       | -0.64*****         | -0.58*****          | -0.65*****             |
| HOMA2 %S (insulin c-peptide)                              | 44       | 0.66*****          | 0.64*****           | 0.70*****              |
| Insulin †                                                 | 44       | -0.68*****         | -0.64*****          | -0.67*****             |
| Insulin C-peptide †                                       | 44       | -0.68*****         | 0.64*****           | -0.75*****             |
| Glucose /Insulin ratio †                                  | 44       | 0.68*****          | 0.62*****           | 0.67*****              |
| HbA1C                                                     | 44       | -0.43**            | -0.47**             | -0.48***               |
| Proinsulin †                                              | 43       | -0.48**            | -0.38*              | -0.55***               |
| <b>Protein, Viscosity &amp; Liver Markers</b>             |          |                    |                     |                        |
| Total Plasma Protein                                      | 42       | -0.60*****         | -0.61*****          | -0.63*****             |
| Plasma globulin                                           | 42       | -0.69*****         | -0.70*****          | -0.71*****             |
| Plasma globulin/Albumin ratio                             | 42       | -0.57*****         | -0.50***            | -0.52**                |
| Plasma %Globulins                                         | 42       | -0.56***           | -0.51***            | -0.48**                |
| Plasma Viscosity †                                        | 43       | -0.54***           | -0.53***            | -0.56*****             |
| Total Serum Protein                                       | 43       | -0.59*****         | -0.64*****          | -0.65*****             |
| Serum Globulins                                           | 43       | -0.55***           | -0.55***            | -0.62*****             |
| Serum Globulin/Albumin Ratio                              | 43       | -0.39**            | -0.44**             | -0.52***               |
| Serum %Globulins                                          | 43       | -0.41**            | -0.44**             | -0.5***                |
| Serum Viscosity, 37                                       | 43       | -0.56***           | -0.57*****          | -0.54***               |
| ALT †                                                     | 43       | -0.31*             | -0.33*              | -0.36*                 |

†Variables that were natural-log transformed in order to meet the normality condition, an assumption inherent to the Pearson correlation.

**Table S2 (continued)**

| <b>Lipid &amp; Lipoprotein Markers</b>                    |    |           |           |           |
|-----------------------------------------------------------|----|-----------|-----------|-----------|
| LDL-C                                                     | 44 | -0.61**** | -0.62**** | -0.61**** |
| IDL †                                                     | 37 | -0.41*    | -0.40*    | -0.51***  |
| Total cholesterol                                         | 44 | -0.57**** | -0.60**** | -0.59**** |
| Triglycerides †                                           | 44 | -0.47**   | -0.48***  | -0.53***  |
| Non-HDL cholesterol                                       | 44 | -0.60**** | -0.62**** | -0.62**** |
| TG/HDL †                                                  | 44 | -0.40**   | -0.41**   | -0.48***  |
| Rem-C †                                                   | 37 | -0.41*    | -0.36*    | -0.52***  |
| ApoB                                                      | 44 | -0.61**** | -0.62**** | -0.63**** |
| ApoB/Apo A-I ratio                                        | 37 | -0.49**   | -0.54***  | -0.59**** |
| LDL-P                                                     | 44 | -0.58**** | -0.61**** | -0.58**** |
| LDL/HDL †                                                 | 44 | -0.54***  | -0.57**** | -0.59**** |
| <b>Inflammation, Coagulation &amp; Blood Cell Markers</b> |    |           |           |           |
| WBC †                                                     | 44 | -0.59**** | -0.53***  | -0.56**** |
| Lymphocyte count                                          | 44 | -0.48**   | -0.46**   | -0.6****  |
| C-reactive protein †                                      | 44 | -0.45**   | -0.44**   | -0.46**   |
| MCHC                                                      | 44 | 0.35*     | 0.34*     | 0.42**    |
| Fibrinogen†                                               | 44 | -0.63**** | -0.61**** | -0.61**** |
| Complement C3c                                            | 41 | -0.46**   | -0.47**   | -0.56**** |
| Complement C4c †                                          | 41 | -0.45**   | -0.45**   | -0.50***  |
| α-1 acid glycoprotein †                                   | 43 | -0.38*    | -0.33*    | -0.36*    |
| Interleukin 6 †                                           | 35 | -0.39*    | -0.37*    | -0.36*    |
| Serine (Ser)                                              | 30 | 0.62***   | 0.63***   | 0.69****  |
| Tyrosine † (Tyr)                                          | 30 | -0.47**   | -0.50**   | -0.52***  |
| Haptoglobin                                               | 42 | -0.38*    | -0.28     | -0.26     |
| Platelet                                                  | 44 | -0.31*    | -0.30*    | -0.24     |
| Plasminogen Activator Inhibitor †                         | 44 | -0.45**   | -0.36*    | -0.28     |
| <b>Electrolyte Markers</b>                                |    |           |           |           |
| Lactate                                                   | 42 | -0.49**   | -0.44**   | -0.57**** |
| Anion Gap, Simple                                         | 43 | -0.53***  | -0.55**** | -0.59**** |
| Anion Gap corr for [albumin]                              | 41 | -0.45**   | -0.42**   | -0.44**   |
| Chloride †                                                | 43 | 0.42**    | 0.47**    | 0.42**    |

**Table S3 Bivariate Correlation Coefficients between Frozen Serum Water T<sub>2</sub> and Metabolic Biomarkers**

| <b>Bivariate correlations Frozen Serum T<sub>2</sub></b> |          |                    |                     |                        |
|----------------------------------------------------------|----------|--------------------|---------------------|------------------------|
| <b>Biomarker</b>                                         | <b>n</b> | <b>r (Pearson)</b> | <b>ρ (Spearman)</b> | <b>M-value (Huber)</b> |
| Fresh Plasma T <sub>2</sub>                              | 43       | 0.79****           | 0.80****            | 0.79****               |
| Fresh Serum T <sub>2</sub>                               | 44       | 0.94****           | 0.93****            | 0.94****               |
| <b>Insulin &amp; Glucose Markers</b>                     |          |                    |                     |                        |
| McAuley Index                                            | 44       | 0.67****           | 0.72****            | 0.71****               |
| QUICKI                                                   | 44       | 0.64****           | 0.64****            | 0.65****               |
| FIRI †                                                   | 44       | -0.64****          | -0.63****           | -0.67****              |
| HOMA-IR (insulin c-pep) †                                | 44       | -0.60****          | -0.61****           | -0.66****              |
| HOMA2-IR (insulin) †                                     | 40       | -0.59****          | -0.55****           | -0.64****              |
| HOMA2 %S (insulin c-peptide)                             | 44       | 0.59****           | 0.61****            | 0.61****               |
| Insulin †                                                | 44       | -0.65****          | -0.64****           | -0.67****              |
| Insulin C-peptide †                                      | 44       | -0.60****          | -0.62****           | -0.68****              |
| Glucose /Insulin ratio †                                 | 44       | 0.65****           | 0.63****            | 0.65****               |
| HbA1C                                                    | 44       | -0.35*             | -0.38*              | -0.42**                |
| Proinsulin †                                             | 43       | -0.54****          | -0.50****           | -0.57****              |
| <b>Protein, Viscosity &amp; Liver Markers</b>            |          |                    |                     |                        |
| Total Plasma Protein                                     | 42       | -0.77****          | -0.76****           | -0.75****              |
| Plasma globulin                                          | 42       | -0.74****          | -0.76****           | -0.76****              |
| Plasma globulin/Albumin ratio                            | 42       | -0.52****          | -0.48****           | -0.55****              |
| Plasma %Globulins                                        | 42       | -0.52****          | -0.49****           | -0.5****               |
| Plasma Viscosity †                                       | 43       | -0.58****          | -0.62****           | -0.65****              |
| Total Serum Protein                                      | 43       | -0.79****          | -0.76****           | -0.76****              |
| Serum Globulins                                          | 43       | -0.64****          | -0.65****           | -0.73****              |
| Serum Globulin/Albumin Ratio                             | 43       | -0.41**            | -0.53****           | -0.59****              |
| Serum %Globulins                                         | 43       | -0.44**            | -0.53****           | -0.57****              |
| Serum Viscosity, 37                                      | 43       | -0.63****          | -0.64****           | -0.64****              |
| <b>Lipid &amp; Lipoprotein Markers</b>                   |          |                    |                     |                        |
| LDL-C                                                    | 44       | -0.58****          | -0.55****           | -0.59****              |
| IDL †                                                    | 37       | -0.49**            | -0.49**             | -0.57****              |
| Total cholesterol                                        | 44       | -0.53****          | -0.52****           | -0.54****              |

**Table S3 (continued)**

|                                                           |    |            |            |            |
|-----------------------------------------------------------|----|------------|------------|------------|
| Triglycerides † (TG)                                      | 44 | -0.47**    | -0.54***   | -0.58***** |
| Non-HDL cholesterol                                       | 44 | -0.57***** | -0.58***** | -0.62***** |
| TG/HDL †                                                  | 44 | -0.41**    | -0.49***   | -0.51***   |
| Rem-C †                                                   | 37 | -0.48**    | -0.44**    | -0.55***   |
| ApoB                                                      | 44 | -0.57***** | -0.59***** | -0.61***** |
| ApoB/Apo A-I ratio                                        | 37 | -0.48**    | -0.55***   | -0.61***** |
| LDL-P                                                     | 44 | -0.59***** | -0.60****  | -0.62***** |
| LDL/HDL †                                                 | 44 | -0.52***   | -0.57***** | -0.62***** |
| <b>Inflammation, Coagulation &amp; Blood Cell Markers</b> |    |            |            |            |
| WBC †                                                     | 44 | -0.37*     | -0.38*     | -0.43**    |
| Lymphocyte count                                          | 44 | -0.32*     | -0.34*     | -0.46**    |
| MCHC                                                      | 44 | 0.35*      | 0.35*      | 0.50***    |
| Fibrinogen†                                               | 44 | -0.49****  | -0.50****  | -0.44**    |
| Complement C3c                                            | 41 | -0.31*     | -0.36*     | -0.44**    |
| Serine (Ser)                                              | 30 | 0.55**     | 0.60***    | 0.55*****  |
| Tyrosine † (Tyr)                                          | 30 | -0.46*     | -0.44*     | -0.47**    |
| Glutamate †                                               | 30 | -0.44*     | -0.42*     | -0.30*     |
| IgG                                                       | 44 | -0.50****  | -0.43**    | -0.58***** |
| <b>Electrolyte Markers</b>                                |    |            |            |            |
| Lactate                                                   | 42 | -0.45**    | -0.49**    | -0.56***** |
| Anion Gap, simple                                         | 43 | -0.56***** | -0.57***** | -0.60***** |
| Anion Gap corr. for [albumin]                             | 41 | -0.42**    | -0.46**    | -0.52***   |
| Chloride †                                                | 43 | 0.35*      | 0.40**     | 0.37*      |

†Variables that were natural-log transformed in order to meet the normality condition, an assumption inherent to the Pearson correlation.

**Table S4 Biomarkers Measured in this Study**

| <u>Category</u>                                                                      | <u>Correlation with frozen plasma water T<sub>2</sub><sup>†</sup></u>                                                        | <u>No correlation with frozen plasma water T<sub>2</sub><sup>†</sup></u>                                                                                                                                                                                                                                                                                                                                                                                                                                |
|--------------------------------------------------------------------------------------|------------------------------------------------------------------------------------------------------------------------------|---------------------------------------------------------------------------------------------------------------------------------------------------------------------------------------------------------------------------------------------------------------------------------------------------------------------------------------------------------------------------------------------------------------------------------------------------------------------------------------------------------|
| <b>Insulin resistance, diabetes &amp; anthropometric markers</b>                     | fasting insulin, insulin C-peptide, proinsulin, HbA <sub>1c</sub> , HOMA-IR, HOMA2%S, QUICKI, FIRI, G/I ratio, McAuley Index | Glucose, body-mass index, waist circumference, age, resting heart rate                                                                                                                                                                                                                                                                                                                                                                                                                                  |
| <b>Protein, viscosity liver function &amp; amino acid markers</b>                    | total serum and plasma protein, serum and plasma globulins, %globulins, viscosity, ALT, GGT, Ser, Tyr                        | serum and plasma albumin, AST, homocysteine, and 33 other amino acid and amino acid metabolites                                                                                                                                                                                                                                                                                                                                                                                                         |
| <b>Lipid &amp; lipoprotein markers</b>                                               | Total cholesterol, non-HDL-C, LDL-C, LDL-P, VLDL-C, IDL-C, remnant-C, apoB, TG, TG/HDL, apoB/apoA-I ratio, LDL/HDL           | HDL-C, HDL <sub>2</sub> , HDL <sub>3</sub> , apoAI, apoE, Lp(a), omega-3 index, DHA, AA, EPA, LpPLA <sub>2</sub> , free fatty acids, phospholipids                                                                                                                                                                                                                                                                                                                                                      |
| <b>Inflammation, acute phase proteins, blood cell &amp; oxidative stress markers</b> | hs-CRP, WBC, neutrophils, lymphocytes, MCHC, fibrinogen, complement C3c, C4c, interleukin-6                                  | RBC, HCT, Hb, MCV, platelets, mean PLT volume, RBC sed. rate, platelet activator inhibitor-1 (PAI-1), ORAC total antioxidant capacity, monocytes, eosinophils, basophils, platelets, haptoglobin, fibronectin, $\alpha$ 2-macroglobulin, transferrin, ceruloplasmin, total iron, TIBC, % iron sat., ferritin, sICAM1, adiponectin, $\alpha$ 1-acid glycoprotein, factor VII, uric acid, neutrophil elastase, endotoxin, staph. enterotoxin, $\alpha$ 1-antitrypsin, IL-10, TNF- $\alpha$ , IL-1 $\beta$ |
| <b>Electrolyte markers</b>                                                           | lactate, anion gap, anion gap corrected for albumin, chloride                                                                | sodium, potassium, CO <sub>2</sub> (bicarbonate)                                                                                                                                                                                                                                                                                                                                                                                                                                                        |
| <b>Kidney and thyroid markers</b>                                                    |                                                                                                                              | BUN, creatinine, eGFR, thyroid stimulating hormone (TSH), free TSH, T4                                                                                                                                                                                                                                                                                                                                                                                                                                  |

<sup>†</sup>A correlation is defined as p<0.05 for all three correlation coefficients: Pearson, Spearman, and Huber M-value. For biomarkers in the middle column, the individual coefficients and statistics are provided in Table 1 and Supplementary Tables S1 and S2. A list of abbreviations is provided in the manuscript.
